# Supplementary material for: Effects of Different Processing Methods Based on Different Drying Conditions on the Active Ingredients of Salvia miltiorrhiza Bunge
Source: MDPI journal article supplement (doi:10.3390/molecules27154860), 2022-07-29
Supplement: s1 [file s1]

**Table S1.** The relative retention time of the common peaks of the 16 batches of *S. multiorrhiza* with different processing.

[illegible]

**Table S2.** The relative peak area of the common peaks of the 16 batches of *S. miltiorrhiza* with different processing.

| No. | The Relative Peak Area |       |       |       |       |       |       |       |       |       |       |       |       |       |       |       | RSD (%) |
|-----|------------------------|-------|-------|-------|-------|-------|-------|-------|-------|-------|-------|-------|-------|-------|-------|-------|---------|
|     | S1                     | S2    | S3    | S4    | S5    | S6    | S7    | S8    | S9    | S10   | S11   | S12   | S13   | S14   | S15   | S16   |         |
| 1   | 0.022                  | 0.032 | 0.019 | 0.015 | 0.016 | 0.026 | 0.027 | 0.045 | 0.035 | 0.028 | 0.020 | 0.035 | 0.021 | 0.031 | 0.101 | 0.062 | 64.680  |
| 2   | 0.015                  | 0.012 | 0.009 | 0.008 | 0.012 | 0.014 | 0.012 | 0.022 | 0.014 | 0.020 | 0.008 | 0.009 | 0.016 | 0.017 | 0.039 | 0.016 | 49.146  |
| 3   | 0.016                  | 0.011 | 0.010 | 0.011 | 0.017 | 0.013 | 0.017 | 0.032 | 0.037 | 0.015 | 0.011 | 0.013 | 0.013 | 0.013 | 0.033 | 0.014 | 49.456  |
| 4   | 0.021                  | 0.022 | 0.017 | 0.023 | 0.018 | 0.024 | 0.014 | 0.022 | 0.022 | 0.011 | 0.014 | 0.017 | 0.016 | 0.023 | 0.034 | 0.016 | 28.560  |
| 5   | 0.019                  | 0.027 | 0.012 | 0.021 | 0.018 | 0.025 | 0.022 | 0.049 | 0.044 | 0.015 | 0.011 | 0.022 | 0.010 | 0.013 | 0.021 | 0.011 | 52.177  |
| 6   | 0.031                  | 0.047 | 0.028 | 0.016 | 0.024 | 0.040 | 0.056 | 0.083 | 0.039 | 0.031 | 0.035 | 0.031 | 0.018 | 0.042 | 0.088 | 0.055 | 49.862  |
| 7   | 0.170                  | 0.160 | 0.117 | 0.129 | 0.183 | 0.171 | 0.180 | 0.326 | 0.395 | 0.139 | 0.099 | 0.119 | 0.124 | 0.134 | 0.240 | 0.081 | 48.226  |
| 8   | 0.074                  | 0.080 | 0.054 | 0.051 | 0.078 | 0.085 | 0.087 | 0.124 | 0.118 | 0.061 | 0.061 | 0.064 | 0.053 | 0.088 | 0.182 | 0.089 | 39.971  |
| 9   | 3.971                  | 3.809 | 2.893 | 3.196 | 3.457 | 3.929 | 4.279 | 7.166 | 6.935 | 2.812 | 2.598 | 3.060 | 2.533 | 3.485 | 6.343 | 2.657 | 38.632  |
| 10  | 0.045                  | 0.051 | 0.034 | 0.033 | 0.050 | 0.049 | 0.048 | 0.079 | 0.078 | 0.044 | 0.038 | 0.049 | 0.041 | 0.041 | 0.087 | 0.031 | 33.987  |
| 11  | 0.037                  | 0.027 | 0.028 | 0.029 | 0.031 | 0.030 | 0.030 | 0.031 | 0.031 | 0.039 | 0.041 | 0.019 | 0.042 | 0.038 | 0.035 | 0.019 | 21.554  |
| 12  | 0.066                  | 0.052 | 0.048 | 0.057 | 0.063 | 0.070 | 0.063 | 0.064 | 0.067 | 0.058 | 0.057 | 0.061 | 0.057 | 0.083 | 0.090 | 0.082 | 17.880  |
| 13  | 0.108                  | 0.079 | 0.077 | 0.075 | 0.081 | 0.079 | 0.074 | 0.062 | 0.064 | 0.096 | 0.094 | 0.091 | 0.087 | 0.087 | 0.063 | 0.103 | 16.803  |
| 14  | 0.408                  | 0.355 | 0.362 | 0.365 | 0.383 | 0.405 | 0.350 | 0.394 | 0.353 | 0.386 | 0.387 | 0.408 | 0.353 | 0.417 | 0.441 | 0.451 | 8.118   |
| 15  | 0.146                  | 0.147 | 0.141 | 0.155 | 0.145 | 0.181 | 0.170 | 0.189 | 0.199 | 0.133 | 0.131 | 0.138 | 0.144 | 0.178 | 0.213 | 0.146 | 15.785  |
| 16  | 0.373                  | 0.353 | 0.344 | 0.330 | 0.326 | 0.329 | 0.358 | 0.298 | 0.320 | 0.392 | 0.355 | 0.364 | 0.375 | 0.324 | 0.299 | 0.349 | 7.772   |
| 17  | 1.000                  | 1.000 | 1.000 | 1.000 | 1.000 | 1.000 | 1.000 | 1.000 | 1.000 | 1.000 | 1.000 | 1.000 | 1.000 | 1.000 | 1.000 | 1.000 | 0.000   |

**Table S3.** The similarity results of the common peaks of the 16 batches of *S. miltiorrhiza* with different processing.

| No. | S1    | S2    | S3    | S4    | S5    | S6    | S7    | S8    | S9    | S10   | S11   | S12   | S13   | S14   | S15   | S16   | Sr.   |
|-----|-------|-------|-------|-------|-------|-------|-------|-------|-------|-------|-------|-------|-------|-------|-------|-------|-------|
| S1  | 1.000 | 1.000 | 0.995 | 0.998 | 0.999 | 1.000 | 1.000 | 0.992 | 0.992 | 0.994 | 0.991 | 0.997 | 0.990 | 0.999 | 0.994 | 0.991 | 1.000 |
| S2  | 1.000 | 1.000 | 0.996 | 0.999 | 0.999 | 1.000 | 1.000 | 0.991 | 0.992 | 0.995 | 0.992 | 0.997 | 0.991 | 0.999 | 0.994 | 0.991 | 1.000 |
| S3  | 0.995 | 0.996 | 1.000 | 0.999 | 0.998 | 0.995 | 0.992 | 0.975 | 0.976 | 1.000 | 0.999 | 1.000 | 0.999 | 0.998 | 0.979 | 0.999 | 0.997 |
| S4  | 0.998 | 0.999 | 0.999 | 1.000 | 1.000 | 0.998 | 0.997 | 0.983 | 0.984 | 0.998 | 0.997 | 1.000 | 0.996 | 1.000 | 0.987 | 0.996 | 0.999 |
| S5  | 0.999 | 0.999 | 0.998 | 1.000 | 1.000 | 0.999 | 0.998 | 0.987 | 0.988 | 0.997 | 0.995 | 0.999 | 0.994 | 1.000 | 0.990 | 0.994 | 1.000 |
| S6  | 1.000 | 1.000 | 0.995 | 0.998 | 0.999 | 1.000 | 1.000 | 0.992 | 0.992 | 0.994 | 0.991 | 0.997 | 0.990 | 0.999 | 0.994 | 0.991 | 1.000 |
| S7  | 1.000 | 1.000 | 0.992 | 0.997 | 0.998 | 1.000 | 1.000 | 0.995 | 0.995 | 0.991 | 0.988 | 0.995 | 0.987 | 0.998 | 0.997 | 0.987 | 0.999 |
| S8  | 0.992 | 0.991 | 0.975 | 0.983 | 0.987 | 0.992 | 0.995 | 1.000 | 1.000 | 0.973 | 0.967 | 0.979 | 0.965 | 0.987 | 1.000 | 0.966 | 0.989 |
| S9  | 0.992 | 0.992 | 0.976 | 0.984 | 0.988 | 0.992 | 0.995 | 1.000 | 1.000 | 0.974 | 0.968 | 0.980 | 0.966 | 0.987 | 0.999 | 0.967 | 0.989 |
| S10 | 0.994 | 0.995 | 1.000 | 0.998 | 0.997 | 0.994 | 0.991 | 0.973 | 0.974 | 1.000 | 1.000 | 0.999 | 0.999 | 0.997 | 0.978 | 0.999 | 0.997 |
| S11 | 0.991 | 0.992 | 0.999 | 0.997 | 0.995 | 0.991 | 0.988 | 0.967 | 0.968 | 1.000 | 1.000 | 0.998 | 1.000 | 0.995 | 0.972 | 1.000 | 0.994 |
| S12 | 0.997 | 0.997 | 1.000 | 1.000 | 0.999 | 0.997 | 0.995 | 0.979 | 0.980 | 0.999 | 0.998 | 1.000 | 0.998 | 0.999 | 0.984 | 0.998 | 0.999 |
| S13 | 0.990 | 0.991 | 0.999 | 0.996 | 0.994 | 0.990 | 0.987 | 0.965 | 0.966 | 0.999 | 1.000 | 0.998 | 1.000 | 0.994 | 0.970 | 0.999 | 0.993 |
| S14 | 0.999 | 0.999 | 0.998 | 1.000 | 1.000 | 0.999 | 0.998 | 0.987 | 0.987 | 0.997 | 0.995 | 0.999 | 0.994 | 1.000 | 0.990 | 0.995 | 1.000 |
| S15 | 0.994 | 0.994 | 0.979 | 0.987 | 0.990 | 0.994 | 0.997 | 1.000 | 0.999 | 0.978 | 0.972 | 0.984 | 0.970 | 0.990 | 1.000 | 0.972 | 0.992 |
| S16 | 0.991 | 0.991 | 0.999 | 0.996 | 0.994 | 0.991 | 0.987 | 0.966 | 0.967 | 0.999 | 1.000 | 0.998 | 0.999 | 0.995 | 0.972 | 1.000 | 0.994 |
| Sr. | 1.000 | 1.000 | 0.997 | 0.999 | 1.000 | 1.000 | 0.999 | 0.989 | 0.989 | 0.997 | 0.994 | 0.999 | 0.993 | 1.000 | 0.992 | 0.994 | 1.000 |

**Table S4.** Principal components initial eigenvalue and contribution rate.

| Principal Components | Eigenvalues | Contribution Rate (%) | Cumulative Contribution Rate (%) |
|----------------------|-------------|-----------------------|----------------------------------|
| A1                   | 6.843       | 40.252                | 40.252                           |
| A2                   | 4.447       | 26.161                | 66.413                           |
| A3                   | 1.902       | 11.189                | 77.602                           |
| A4                   | 1.452       | 8.543                 | 86.145                           |

**Table S5.** Factor loading matrix after rotation.

| Peak No. | Principal Components |        |        |        |
|----------|----------------------|--------|--------|--------|
|          | 1                    | 2      | 3      | 4      |
| A1       | -0.316               | 0.612  | 0.572  | -0.012 |
| A2       | 0.249                | 0.333  | 0.061  | -0.829 |
| A3       | 0.365                | -0.653 | 0.525  | -0.315 |
| A4       | 0.725                | -0.020 | -0.194 | 0.355  |
| A5       | 0.241                | -0.788 | 0.073  | 0.406  |
| A6       | -0.502               | 0.370  | 0.405  | 0.243  |
| A7       | 0.400                | -0.875 | 0.141  | -0.108 |
| A8       | 0.356                | -0.120 | 0.790  | -0.041 |
| A9       | 0.484                | -0.824 | 0.087  | 0.188  |
| A10      | 0.693                | -0.507 | 0.171  | -0.204 |
| A11      | 0.825                | 0.163  | -0.258 | -0.311 |
| A12      | 0.842                | 0.423  | 0.186  | 0.097  |
| A13      | 0.857                | 0.442  | -0.048 | 0.031  |
| A14      | 0.905                | 0.372  | 0.014  | 0.143  |
| A15      | 0.273                | 0.604  | 0.514  | 0.289  |
| A16      | 0.901                | 0.312  | -0.165 | 0.025  |
| A17      | 0.940                | 0.245  | -0.111 | 0.117  |

## 1. Validation of methodology

According to the Pharmacopeia guidelines of the People's Republic of China (2020 Version), the validation of HPLC methodology was performed with linear regression analysis and tests of precision, repeatability, stability, and recovery rate.

### 1.1. Linear relationships

Each standard curve was obtained by plotting the PA (y) against the mixed standard solution concentrations (x,  $\mu\text{g}\cdot\text{mL}^{-1}$ ). The results are shown in Table S6. The six ingredients each had an excellent linear relationship within their respective detection ranges and the linear coefficient of determination ( $r^2$ ) exceeded 0.999.

### 1.2. Precision, repeatability, stability, and recovery tests

Method precision and repeatability were evaluated via successive analyses of six replicates of the same powder sample. The relative standard deviation (R.S.D.) was 0.03-1.66% for retention time ( $t_R$ ) and 1.11-2.75% for the PA of six characteristic peaks. These findings showed that the method had good repeatability and precision. The stability of the sample solutions was determined by analysing samples at 0, 2, 4, 8, 16, and 24 h after solution preparation. The R.S.D. was 0.04-1.80% for  $t_R$  and 1.61-2.89% for the PA of the characteristic peaks. These results showed that the sample solution had good stability within 24 h. The recovery rate was determined by the standard addition method. The recovery of the six standards ranged from 98.01% to 101.92%. The R.S.D. was 1.48-2.61% for PA. The results of the precision, repeatability, stability, and recovery tests are shown in Table S7 and Table S8.

**Table S6.** Linear relationships table of six active ingredients.

| Components          | Regression Equation                   | R2     | Linear Range (ug·mL <sup>-1</sup> ) |
|---------------------|---------------------------------------|--------|-------------------------------------|
| Rosmarinic acid     | $y = 15,878,934.4174x + 9,901.6548$   | 0.9998 | 0.72-715.00                         |
| Salvianolic acid B  | $y = 12,215,141.0899x - 313,767.3676$ | 0.9996 | 3.36-3,360.00                       |
| Dihydrotanshinone I | $y = 38,953,496.8495x - 53,097.2660$  | 0.9990 | 0.09-94.50                          |
| Cryptotanshinone    | $y = 57,800,973.6466x - 90,945.4410$  | 0.9990 | 0.10-102.50                         |
| Tanshinone I        | $y = 36,295,424.6970x + 3,077.9435$   | 0.9997 | 0.14-135.50                         |
| Tanshinone IIA      | $y = 62,899,832.6455x - 170,731.2788$ | 0.9990 | 0.22-215.00                         |

**Table S7.** Analytical results of precision, repeatability of six ingredients.

| Components          | Precision (n=6)                    |                                    | Repeatability (n = 6)              |                                    |
|---------------------|------------------------------------|------------------------------------|------------------------------------|------------------------------------|
|                     | RSD of relative Retention time (%) | RSD of Relative Retention Area (%) | RSD of Relative Retention Time (%) | RSD of Relative Retention Area (%) |
| Rosmarinic acid     | 0.47                               | 2.75                               | 1.52                               | 2.89                               |
| Salvianolic acid B  | 1.66                               | 1.18                               | 1.80                               | 2.68                               |
| Dihydrotanshinone I | 0.28                               | 1.45                               | 0.04                               | 2.61                               |
| Cryptotanshinone    | 0.07                               | 1.44                               | 0.07                               | 1.81                               |
| Tanshinone I        | 0.04                               | 1.20                               | 0.05                               | 1.61                               |
| Tanshinone IIA      | 0.05                               | 1.11                               | 0.04                               | 1.89                               |

**Table S8.** Analytical results of stability and recovery tests of six ingredients.

| Components          | Stability (n = 6)                  |                                    | Recovery rate (n = 6) |                           |
|---------------------|------------------------------------|------------------------------------|-----------------------|---------------------------|
|                     | RSD of Relative Retention Time (%) | RSD of Relative Retention Area (%) | Recovery Rate (%)     | RSD of Retention Area (%) |
| Rosmarinic acid     | 0.10                               | 1.70                               | 98.01                 | 1.48                      |
| Salvianolic acid B  | 1.06                               | 1.73                               | 101.56                | 1.95                      |
| Dihydrotanshinone I | 0.03                               | 1.76                               | 101.92                | 2.25                      |
| Cryptotanshinone    | 0.06                               | 1.35                               | 100.63                | 2.61                      |
| Tanshinone I        | 0.05                               | 1.64                               | 98.27                 | 2.44                      |
| Tanshinone IIA      | 0.10                               | 1.31                               | 100.75                | 2.39                      |
